# Supplementary material for: Comparative Genomic Analysis ofLactococcus garvieaeStrains Isolated from Different Sources Reveals Candidate Virulence Genes
Source: Hindawi journal article supplement (doi:10.1155/2012/728276), 2012-01-01
Supplement: f2 [file 728276.f2.pdf]

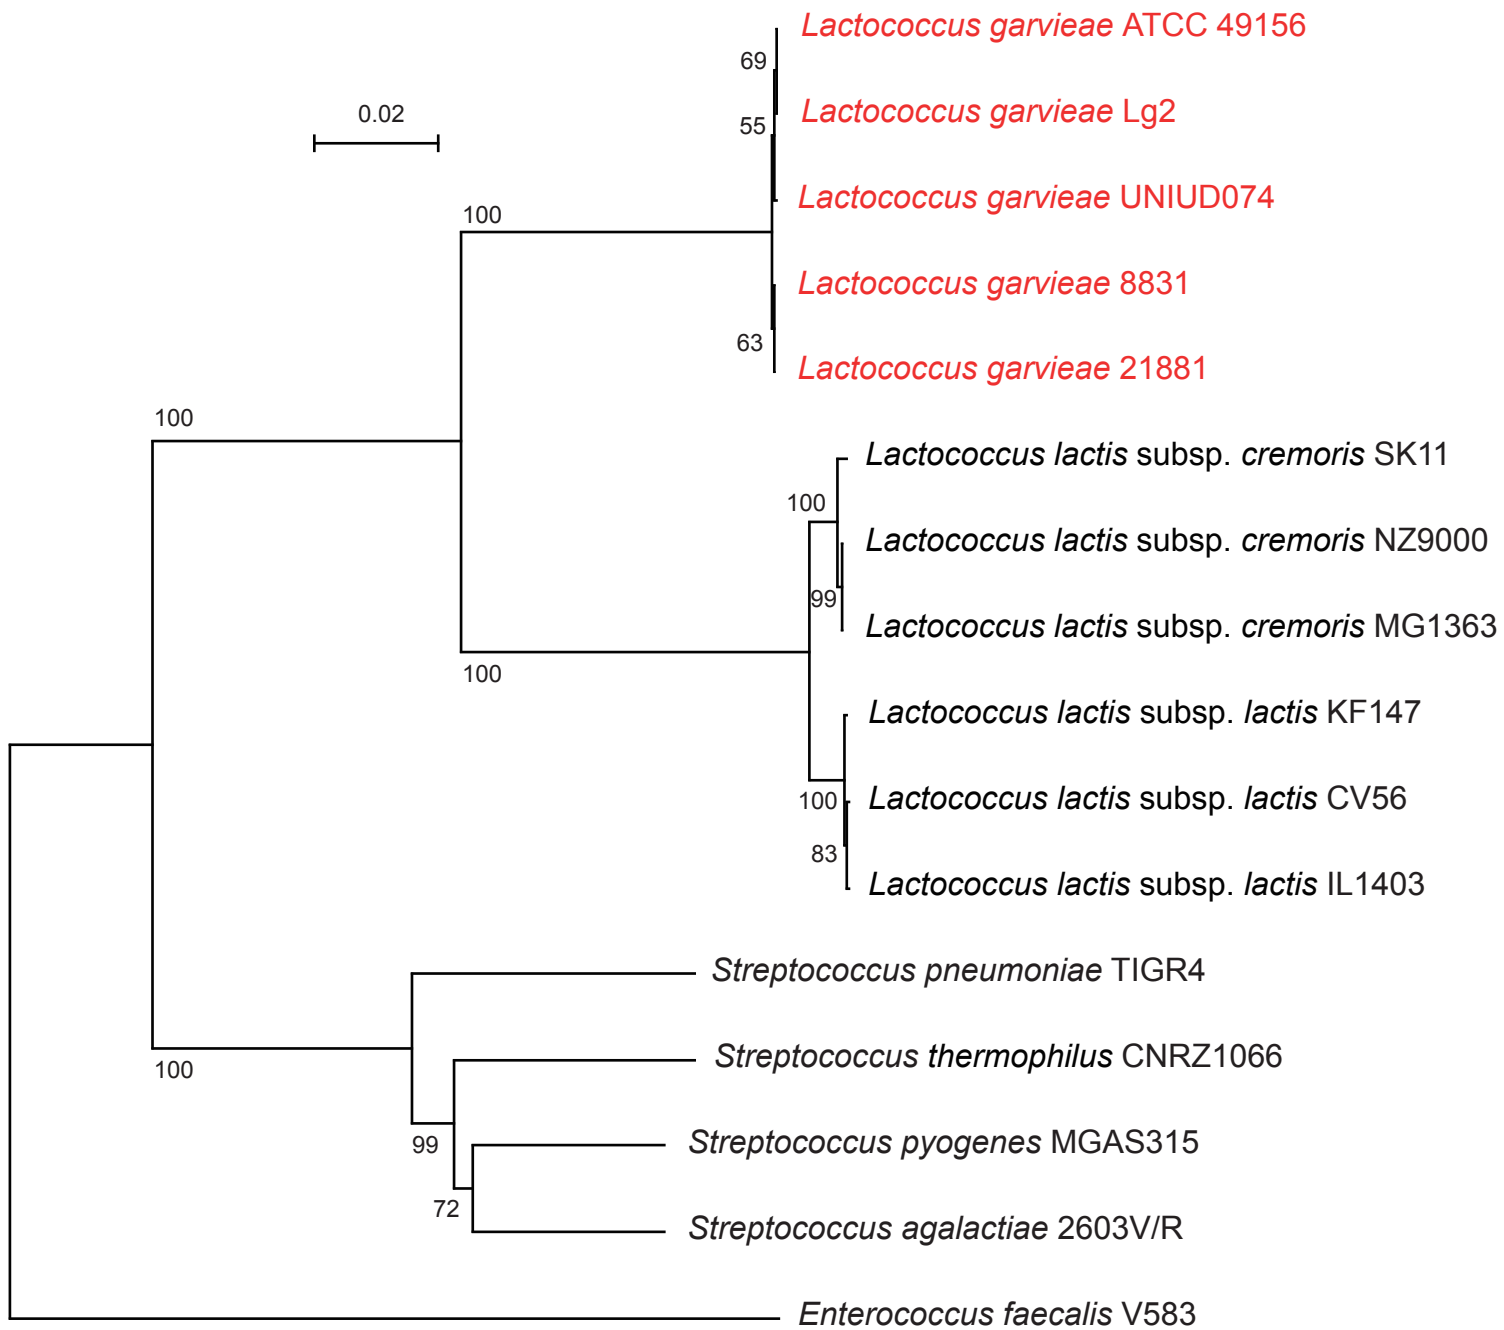

## Supplementary Table 1

Sequences of the four possible adhesins specific to *L. garvieae* 21881

```
>contig00042 complement(5326..8865) 1179aa (PF06458)
MESKNYKKILKSVLVCGAAIMSMTTINALADETEPLQNFTQQMDSMDNTEASNFLRSYGL
RNGTVAGSKVSVSRTSSGFTVQNPKENVESFTANWITDTSKIKLTVSNAFYVNTPIEFSS
KIKQPLAKGEELLIPLNITGTIFNSSSSSYTYEGNITQNNGTNYTSQDGSFSYNYDNKTGN
LKVKALDDRGLTDYSGLTFLNANNWIPVPLRENPMPLKGGVAGNYGAKGSGATVKVKVGD
KETSETLTNTADIDFTTTLQAYNNDIFGKGAEYTTQKTASSSTNFLANFPLINQLKKGKT
KNLLDESMNHYEYVQVSNKAFKNEEDIFKGLSIETYIPIGSSSSGAPITAIQAQATVDFK
PEFKSVIKNASYDKEKQIFSFDLNKKTDWQALGADLLQNEAYGSSNGKERAAWITDYLK
AMANGNVDQNTTFSSYYPVNSVSVFVPVNNNFSLKVDVTVTNSLSKAKTTNHIIVDPVKAG
NGDTTKAAVQQLQMDSEGNPIGELQTPSYYGSGDAYTVTPPVIKGYRLLNVNPQSLIDKL
GITNVVDQQKFDSSNIGNIYNVVEYVKEVPLTYSVIDDTTGETLEEHQDLATGALNQE
ANIKENQDKLQESYKSKGYLLGNIENGNLPVPTDEKGYNVTLHLSHDAHKAVIDGKS
KTITQTVHYQGAGNETPEDNVQTLTFTSKITQITIDSVTQAVLSEEAPVWSEQOTTAKVTT
PQIKDYEADQAVVEGSTFTHDNSDKKVTVYKSTLAPLTYTIVDDTTDKTLEKEVDFAMG
TVGEEVNTSDNQEKLKQLIKSYTDKGYLLGNSENADLPTPKDNTGYTITLHFTHATHEQV
VDGETKKVTQTIHYQGAGNETPEDDVQVLFTFTSKITQITIDNVTHRVLAEAKPVWPEQOST
RAVDSPTLKDYAADKESVPSMNYNDSYDSEDVVLEVNYSSSTIAPITYSVIDDTAGKTLEDKK
DFVMSHVLEPINTSENQDKLKSIAKSYTDKGYVLGNIENEELPVPDGTGKYDVVFHLTHG
TSEKVIDDESKTVTQKIQYKAGAKTPEEDIQKFVFTSTLTQITIDVTGDVVSTSGPTWS
DNQHSKAVKTPEIDGYSSDIDTVKSYDYDHEAKDKTITVSYKEVPPVKEVKVKNILP
QTGTEAEIGLAFTGAALVLIAGALYVKSCLRKESIKNDD
```

```
>contig00042 complement(39668..43489) 1273aa (PF05738)
MKKQHAKIRQLTKALTEKKLSHFSSMRKSGRWRITRSAILVLAGGTGLIAVINPSLISTVA
YALTLPPGNTQIGSIGNAPVIQTSNNNFSTMQPLFDSLGTGTIQPEYIVGDTQDGTGGKPV
AWNSSTTYAGTAISNANSLVNGANGLSYDTHYGMGISDGFQDNDKFNYSKGOEINIKN
IGTAYNVKTGKNVPIGMAVKINDATYYDSTTSSSPRNFGDGFRLLVGARNNGGTITLGY
MVSMGIPNSGSGQGNEGGGSGGSGDAIGAASGIPESVRGTISLYDMDTKQNLPASTIM
AMKVSDIDAGQSAQLSNGALGYIVSKPTNLELRDNLITAKGNDTVVGD SANLNANSYIAL
YNGSSTALNFVDNNGNQGSIIQAVFGNLGSTSPHQSLGYIEIDKTTIQYGKDLPNPLY
```

DFQDISFDVLDSTGKKVDTLKLDSGKSVKSKGLPPGKYTLHETSGKWSSTGQTVLPDFT  
VEVKAGDTTTAKPKNTAVTGEITIKKSGVESGDAMWNNENYTTLEGTTFKLTSKTDGKTYTA  
VIGKESNGEWKTTVKDLPLGTYTIEETKASPGFTNTFEKKEVTLSYKDQHTEIVFGETKG  
TNQEVKGENTLKKSDNETGTDQNGKGVLTAKYAYFHDDDSTGSSPHKKGDPVKWSEKPA  
PKLLAGEVVHSAIIGGNPVSYGDNVIEIDDESLSIALGNLPAGKYKVREVDAGEGYVTD  
PTEHKFEIQKQDDKTQNIIVTPESSSKEQLIKAKITLDMVTLPDSQGGSGYNGIEFTAEP  
MEGTVADPVKFTVGVNPNVTGDDGYASQELAYGDWKVSETKGVVEGYEDVKPVYIHMEDTE  
KDILTISASYEDFSKPFKRTFSLKDSSTESNPNGEGTVGEVTPEVPTISLSTIHFNDN  
PTPEKVPSIDIEKANDKIPEPGEGNHKDKDNNGGENDRDTPDTALEVESGKSTAIKFRFT  
NNGTEALTHLVSDKTIEGGISIKDPAWFFNGEKLSTNKDGELVTKDGKLLVLQPDEFVT  
GEGTLPPELSDGKLGDEVSVSGVGVESGKEVGEDDKWYGKPKKEEVPSIDIEKADSKAPEA  
GEGNHKDKPNNAGENDHDTEDTAKELEENKATEIFFKTTNNGTEPLTHLKIVDKTIAGKA  
NVKNIKLYKEKPLKVNKDGELETTEDGKLLVLNPGETIEGKGTLEGLAAGDIHGDNVTVD  
GVGVHSGKKVGDNDNWWYGKVTTPKTPEQPKNIFNISLPKTMKAQTILTAIAAVIVVIVA  
GLGTFFYRKNMK

>contig00026 complement(51658..52068) 136aa (PF06458)  
VTFTRQVSTDTVTGKETYGSWSADQSFAAVTSPVIKGYTPDQAEIGAQTVSGDASDLDF  
VIYTKDAPTKPVNPSQPTTPAKPVQAGQAAATNFVDQRLPQTGETDQQHMTLSGLLLLAM  
SSVLGLFGMTKRQRKE

>contig00049 complement(2350..3180) 276aa  
MKKTLIAGLILVTVSIGVQASADSINGYQVTLTDSNTAIGKNGLIWHNDGGTWTYADDGSE  
NGFIAPDKPEIPAIAIKTPKIPESTAKPIVPHKVLPEQKIPTKLLTVDTTDNIPGEVVNPQ  
HIEQLTPPNPNVGAHLDAHQHIEKAPKPIKQNIPEPIAVKNLTEKPKINKNSSSTVRIIE  
PKKLDNSVTHYSIPSDTEQEIKKAKNDTHVATLTPKTQAVLTTLGTGMKSSPTRTYQAKG  
TPLPATGEDDTMTYVVLGMSSIVGAAVLALYLQRNS

\* The LPxTG-type motifs are highlighted in blue.
